# Supplementary material for: Impact of cytokine release syndrome on cardiac function following CD19 CAR-T cell therapy in children and young adults with hematological malignancies
Source: PubMed Central journal article supplement (PMC7473612; doi:10.1136/jitc-2020-001159), 2020-09-03
Supplement: jitc-2020-001159supp001.pdf [file jitc-2020-001159supp001.pdf]

**Supplemental Table 1.**

**Patient Demographics Stratified by those that had Cardiac Dysfunction defined by > 15% Relative Change in Global Longitudinal Strain and/or  $\geq$  10% Absolute Decrease in Left Ventricular Ejection Fraction (LVEF) Compared with Baseline**

|                                                                                                                                                                                                                                                                                                                                                                                                  | <b>Cardiac Dysfunction<br/>n=12</b> | <b>No Cardiac Dysfunction<br/>n=40</b> | <b>p Value*</b> |
|--------------------------------------------------------------------------------------------------------------------------------------------------------------------------------------------------------------------------------------------------------------------------------------------------------------------------------------------------------------------------------------------------|-------------------------------------|----------------------------------------|-----------------|
| Age, median (range), y                                                                                                                                                                                                                                                                                                                                                                           | 15.3 (10-30)                        | 12.8 (4-27)                            | 0.092           |
| Male, n (%)                                                                                                                                                                                                                                                                                                                                                                                      | 11 (91.7%)                          | 30 (75%)                               | 0.42            |
| Diagnosis                                                                                                                                                                                                                                                                                                                                                                                        | ALL, n (%)                          | 11 (91.7%)                             | 0.41            |
|                                                                                                                                                                                                                                                                                                                                                                                                  | NHL, n (%)                          | 1 (8.3%)                               |                 |
| Primary refractory                                                                                                                                                                                                                                                                                                                                                                               | 4 (33.3%)                           | 9 (22.5%)                              | 0.096           |
| Prior lines of therapy                                                                                                                                                                                                                                                                                                                                                                           | >4, n (%)                           | 0 (0%)                                 |                 |
|                                                                                                                                                                                                                                                                                                                                                                                                  | 2-4, n (%)                          | 12 (100%)                              | 31 (77.5%)      |
| Prior HSCT                                                                                                                                                                                                                                                                                                                                                                                       | 0, n (%)                            | 6 (50%)                                | 0.74            |
|                                                                                                                                                                                                                                                                                                                                                                                                  | 1, n (%)                            | 6 (50%)                                |                 |
|                                                                                                                                                                                                                                                                                                                                                                                                  | 2, n (%)                            | 0 (0%)                                 |                 |
| Prior TBI, n (%)                                                                                                                                                                                                                                                                                                                                                                                 | 6 (50%)                             | 17 (42.5%)                             | 0.74            |
| Prior immunotherapy, n (%)                                                                                                                                                                                                                                                                                                                                                                       | 2 (16.7%)                           | 9 (22.5%)                              | 1.00            |
| Prior anthracycline exposure, median (range), doxorubicin equivalents                                                                                                                                                                                                                                                                                                                            | 202 (110-571)                       | 205 (70-620)                           | 0.69            |
| Baseline left ventricular ejection fraction, median (range), %                                                                                                                                                                                                                                                                                                                                   | 61% (50-70%)                        | 60% (50-72%)                           | 0.77            |
| Baseline left ventricular global strain, median (range), %<br>n=37                                                                                                                                                                                                                                                                                                                               | 18.2% (14.1 to 22.2 %)              | 16.8% (14.1 to 23.5 %)                 | 0.78            |
| Performance status, median (range) %                                                                                                                                                                                                                                                                                                                                                             | 90% (40-100%)                       | 90% (50-100%)                          | 0.11            |
| Cardiac dysfunction is defined as a $\geq$ absolute 10% decrease in left ventricular ejection fraction (LVEF) compared with baseline, new onset left ventricular systolic dysfunction $\geq$ grade 2, LVEF < 50%, or >15% relative reduction in left ventricular global longitudinal strain (GLS) compared with baseline; Global longitudinal strain (GLS) is presented in absolute numbers [%]. |                                     |                                        |                 |

**Supplemental Table 2.**

**Characteristics of Patients with Cytokine Release Syndrome (CRS) Stratified by those that had Cardiac Dysfunction defined by > 15% Relative Change in Global Longitudinal Strain and/or  $\geq$  10% Absolute Decrease in Left Ventricular Ejection Fraction (LVEF) Compared with Baseline**

|                                         | <b>Cardiac Dysfunction<br/>n=12</b> | <b>No Cardiac Dysfunction<br/>n=25</b> |        |
|-----------------------------------------|-------------------------------------|----------------------------------------|--------|
| Time to onset of CRS, median (range), d | 3 (1-7)                             | 6 (1-12)                               | 0.052  |
| CRS Max Grade <sup>^</sup>              | 1, n (%)                            | 1 (8.3%)                               | 0.43** |
|                                         | 2, n (%)                            | 7 (58.3%)                              |        |
|                                         | 3, n (%)                            | 2 (16.7%)                              |        |
|                                         | 4, n (%)                            | 2 (16.7%)                              |        |

|                                                                                                                                                                                                                                                                                                                                                                                                                                                                                                                                                                                                                                                                                                                                                                                                                                                                                                               |          |            |          |                   |
|---------------------------------------------------------------------------------------------------------------------------------------------------------------------------------------------------------------------------------------------------------------------------------------------------------------------------------------------------------------------------------------------------------------------------------------------------------------------------------------------------------------------------------------------------------------------------------------------------------------------------------------------------------------------------------------------------------------------------------------------------------------------------------------------------------------------------------------------------------------------------------------------------------------|----------|------------|----------|-------------------|
| ASTCT CRS Max Grade <sup>#</sup>                                                                                                                                                                                                                                                                                                                                                                                                                                                                                                                                                                                                                                                                                                                                                                                                                                                                              | 1, n (%) | 1 (8.3%)   | 15 (60%) | 0.006**           |
|                                                                                                                                                                                                                                                                                                                                                                                                                                                                                                                                                                                                                                                                                                                                                                                                                                                                                                               | 2, n (%) | 3 (25%)    | 6 (24%)  |                   |
|                                                                                                                                                                                                                                                                                                                                                                                                                                                                                                                                                                                                                                                                                                                                                                                                                                                                                                               | 3, n (%) | 6 (50%)    | 3 (12%)  |                   |
|                                                                                                                                                                                                                                                                                                                                                                                                                                                                                                                                                                                                                                                                                                                                                                                                                                                                                                               | 4, n (%) | 2 (16.7%)  | 1 (4%)   |                   |
| Duration of fever > 38, median (range), d                                                                                                                                                                                                                                                                                                                                                                                                                                                                                                                                                                                                                                                                                                                                                                                                                                                                     |          | 5 (3-11)   | 5 (1-14) | 0.10              |
| Duration of fever > 40, median (range), d                                                                                                                                                                                                                                                                                                                                                                                                                                                                                                                                                                                                                                                                                                                                                                                                                                                                     |          | 4 (1-6)    | 2 (1-6)  | 0.19              |
| Duration of tachycardia <sup>@</sup> , median (range), d                                                                                                                                                                                                                                                                                                                                                                                                                                                                                                                                                                                                                                                                                                                                                                                                                                                      |          | 7 (2-9)    | 5 (1-30) | 0.75              |
| ICU transfer, n (%)                                                                                                                                                                                                                                                                                                                                                                                                                                                                                                                                                                                                                                                                                                                                                                                                                                                                                           |          | 11 (91.6%) | 10 (40%) | 0.004             |
| Received Tocilizumab, n (%)                                                                                                                                                                                                                                                                                                                                                                                                                                                                                                                                                                                                                                                                                                                                                                                                                                                                                   |          | 4 (33%)    | 3 (12%)  | 0.18              |
| Received steroids, n (%)                                                                                                                                                                                                                                                                                                                                                                                                                                                                                                                                                                                                                                                                                                                                                                                                                                                                                      |          | 3 (25%)    | 1 (4%)   | 0.090             |
| Required vasopressor support                                                                                                                                                                                                                                                                                                                                                                                                                                                                                                                                                                                                                                                                                                                                                                                                                                                                                  | 1 agent  | 4 (33%)    | 2 (8%)   | 0.11 <sup>s</sup> |
|                                                                                                                                                                                                                                                                                                                                                                                                                                                                                                                                                                                                                                                                                                                                                                                                                                                                                                               | >1 agent | 1 (8.3%)   | 2 (8%)   |                   |
| Required milrinone, n (%)                                                                                                                                                                                                                                                                                                                                                                                                                                                                                                                                                                                                                                                                                                                                                                                                                                                                                     |          | 1 (8.3%)   | 0        | 0.32              |
| Required mechanical ventilation, n (%)                                                                                                                                                                                                                                                                                                                                                                                                                                                                                                                                                                                                                                                                                                                                                                                                                                                                        |          | 3 (25%)    | 1 (4%)   | 0.090             |
| <p>Cardiac dysfunction is defined as a <math>\geq 10\%</math> absolute decrease in left ventricular ejection fraction (LVEF) compared with baseline, new onset left ventricular systolic dysfunction <math>\geq</math> grade 2, LVEF &lt; 50%, or &gt;15% relative reduction in left ventricular global longitudinal strain (GLS) compared with baseline. Intensive care unit, ICU; <sup>#</sup>CRS Max Grade as per Lee, et al. Blood 2014; <sup>@</sup>American Society for Transplantation and Cellular Therapy (ASTCT) CRS grading was retrospectively incorporated; <sup>@</sup>n=36; *The <i>p</i> value is comparing treatment course characteristics of those with and without cardiac dysfunction. **CRS grading compared mild CRS, grade 1/2 vs severe CRS, grade 3/4; <sup>s</sup><i>p</i> value compared requiring any pressor support vs none in those with and without cardiac dysfunction.</p> |          |            |          |                   |

**Supplemental Table 3:****Characteristics of Patients with Cardiac Dysfunction including those that had > 15% Relative Change in Global Longitudinal Strain**

| Patient | Prior Anthracycline Exposure (mg/m <sup>2</sup> ) | Baseline LVEF | Lowest LVEF | Baseline LVGLS             | Lowest LVGLS | Max CRS <sup>^</sup> grade | Vasoactive support? | Troponin Elevation? | Peak Troponin (ng/mL) |
|---------|---------------------------------------------------|---------------|-------------|----------------------------|--------------|----------------------------|---------------------|---------------------|-----------------------|
| 14      | 360                                               | 64%           | 20%         | Not performed <sup>s</sup> | 7.6%         | 4                          | Yes                 | Yes                 | 6.23                  |
| 16      | 110                                               | 70%           | 45%         | 18.7%                      | 14.1%        | 3                          | No                  | Yes                 | 0.117                 |
| 22      | 210                                               | 55%           | 50%         | 15.9%                      | 10.3%        | 2                          | Yes                 | Not performed       | --                    |
| 25      | 238                                               | 58%           | 65%         | 18.8%                      | 12.1%        | 2                          | No                  | Not performed       | --                    |
| 32      | 270                                               | 65%           | 60%         | 19.5%                      | 15.2%        | 2                          | No                  | Not performed       | --                    |
| 38      | 100                                               | 65%           | 60%         | 22.2%                      | 14.3%        | 1                          | No                  | Not performed       | --                    |

|                                                                                                                                                                                                                                                                                                                                                                                                                                                                                                                                                                                                                                                                                                        |     |     |     |                            |       |   |     |               |        |
|--------------------------------------------------------------------------------------------------------------------------------------------------------------------------------------------------------------------------------------------------------------------------------------------------------------------------------------------------------------------------------------------------------------------------------------------------------------------------------------------------------------------------------------------------------------------------------------------------------------------------------------------------------------------------------------------------------|-----|-----|-----|----------------------------|-------|---|-----|---------------|--------|
| 39                                                                                                                                                                                                                                                                                                                                                                                                                                                                                                                                                                                                                                                                                                     | 195 | 60% | 25% | 14.6%                      | 5.9%  | 3 | No  | Yes           | 0.113  |
| 45                                                                                                                                                                                                                                                                                                                                                                                                                                                                                                                                                                                                                                                                                                     | 570 | 55% | 10% | 14.1%                      | 5.3%  | 4 | Yes | No*           | <0.010 |
| 46                                                                                                                                                                                                                                                                                                                                                                                                                                                                                                                                                                                                                                                                                                     | 181 | 60% | 64% | 21.8%                      | 17.9% | 2 | No  | No*           | <0.010 |
| 49                                                                                                                                                                                                                                                                                                                                                                                                                                                                                                                                                                                                                                                                                                     | 100 | 65% | 65% | 17.8%                      | 13.9% | 2 | Yes | Not performed | --     |
| 51                                                                                                                                                                                                                                                                                                                                                                                                                                                                                                                                                                                                                                                                                                     | 355 | 50% | 40% | 11.6%                      | 12.5% | 2 | No  | No*           | <0.010 |
| 52                                                                                                                                                                                                                                                                                                                                                                                                                                                                                                                                                                                                                                                                                                     | 180 | 61% | 45% | Not performed <sup>#</sup> | 14%   | 2 | Yes | Yes           | 0.016  |
| <p>Cardiac dysfunction is defined as a <math>\geq 10\%</math> absolute decrease in left ventricular ejection fraction (LVEF) compared with baseline, new onset left ventricular systolic dysfunction <math>\geq</math> grade 2, LVEF &lt; 50%, or &gt;15% relative reduction in left ventricular global longitudinal strain (GLS) compared with baseline; Global longitudinal strain (GLS) is presented in absolute numbers [%] <sup>§</sup>Outside baseline echo; <sup>#</sup>GLS was not able to be performed due to image quality on baseline echo; <sup>^</sup>CRS Max Grade as per Lee, et al. Blood 2014. *Troponin levels were drawn and undetectable, lower limit of detection 0.010 ng/mL</p> |     |     |     |                            |       |   |     |               |        |
